# Supplementary material for: Gas-phase reaction of two unsaturated ketones with atomic Cl and O3: kinetics and products
Source: Royal Society of Chemistry journal article supplement (doi:10.1039/c4cp05461j), 2015-01-01
Supplement: c4cp05461j1.pdf [file c4cp05461j1.pdf]

Electronic Supplementary Information for

Gas-phase reaction of two unsaturated ketones with Cl atom and O<sub>3</sub>:

kinetics and products

Jing Wang<sup>a,b</sup>, Li Zhou<sup>a,b</sup>, Weigang Wang<sup>a\*</sup>, Maofa Ge<sup>a\*</sup>

<sup>a</sup>Beijing National Laboratory for Molecular Sciences (BNLMS), State Key Laboratory for Structural Chemistry of Unstable and Stable Species, Institute of Chemistry, Chinese Academy of Sciences, Zhongguancun, Beijing 100190, China; <sup>b</sup>University of Chinese Academy of Sciences, Beijing, 100049, China.

1. The Calibration of PTR-MS

We made calibrations for the two reactants (MBO332 and MPO332) and the five products: formaldehyde, acetaldehyde, formic acid, methanol and 2, 3-butanedione. They were calibrated by the commercial standards in the PTR-MS using the Teflon bags<sup>1</sup>.

The concentrations of compounds for which pure commercial standards were not available were determined by the measured rate constants of the proton transfer reactions<sup>2,3</sup>. For the products without measured rate constants, an estimated rate constant (*k*) of  $2 \times 10^{-9} \text{ cm}^3 \text{ molecule}^{-1} \text{ s}^{-1}$  was used. The rate constants for the proton transfer reaction of most compounds are generally within  $\pm 20\%$  of the estimated *k*.

Scheme S1. Proposed Reaction pathways for the reaction of MPO332 with Cl atom

Scheme S2. Proposed reaction pathways of MPO332 with O<sub>3</sub>

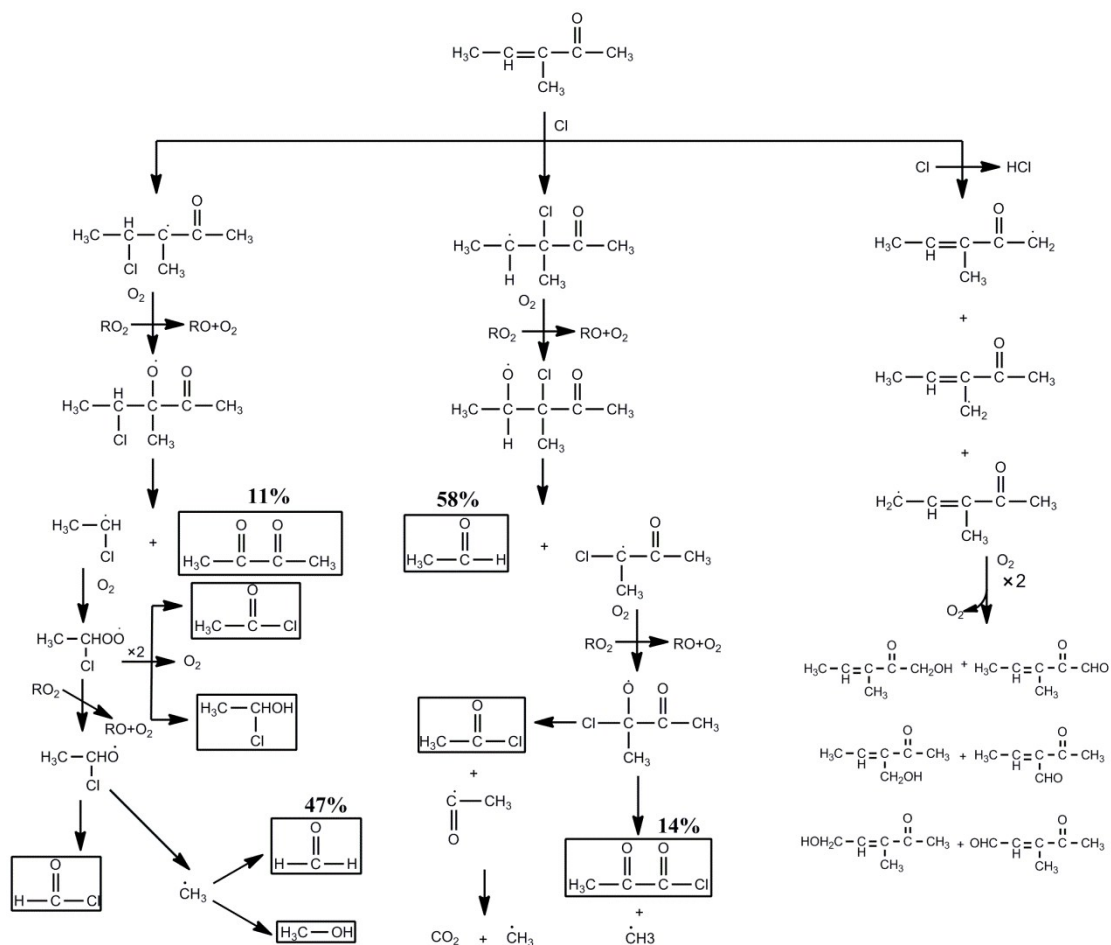

Scheme S1. Proposed Reaction pathways for the reaction of MPO332 with Cl atom

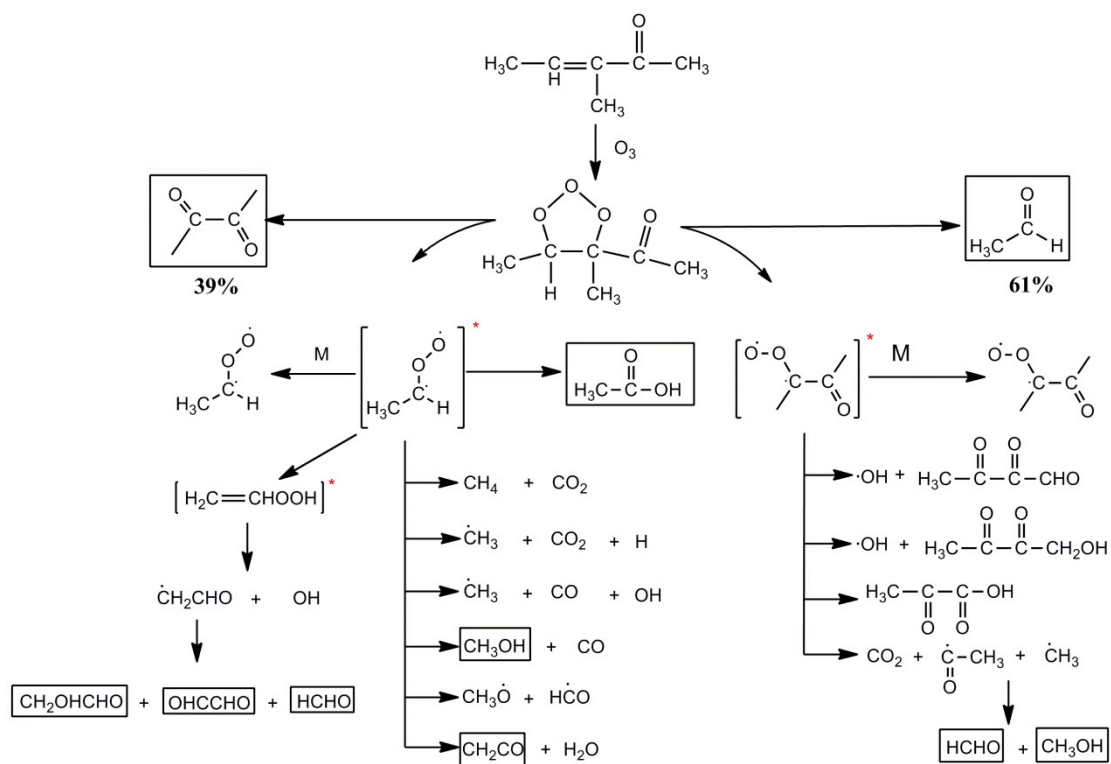

Scheme S2. Proposed reaction pathways of MPO332 with  $O_3$

#### Reference

1. A. Lee, A. H. Goldstein, M. D. Keywood, S. Gao, V. Varutbangkul, R. Bahreini, N. L. Ng, R. C. Flagan and J. H. Seinfeld, *J. Geophys. Res.-Atmos.*, 2006, **111**.
2. W. Lindinger and A. Jordan, *Chem. Soc. Rev.*, 1998, **27**, 347-375.
3. J. Zhao and R. Zhang, *Atmos. Environ.*, 2004, **38**, 2177-2185.
